# Supplementary material
Source: publisher figshare collection journal article supplement (https://gsajournals.figshare.com/articles/dataset/_/14273330)
Supplement: Supplementary file 1 [file 1]

## Sheet: Sheet1
Table S8. Expression data from tassel tissue of known interactors with the Homo sapiens AAAS gene.
Gene Name	Maize ID	e-valuea	Mean Exp. (ali1-1)	Mean Exp. (wild type)	log2FC	p-val.	Genome wide FDRb
CTDNEP1-L1	GRMZM2G162347	5e-36	2043.42	1471.09	0.4738	0.0347	0.1229
CTDNEP1-L2	GRMZM2G068690	6.7e-36	934.978	906.122	0.0445	0.8578	0.9198
CTDNEP1-L3	GRMZM2G122362	4.1e-30	711.489	395.701	0.8442	0.0017	0.0159*
CTDNEP1-L4	GRMZM2G124179	1.2e-28	809.385	950.248	-0.2304	0.3693	0.5492
CTDNEP1-L5	GRMZM2G347623	1.7e-28	2874.31	2159.47	0.412	0.0815	0.2104
CUL7-L1	GRMZM2G054247	2.1e-05	789.579	778.669	0.0182	0.9463	0.9705
CUL7-L2	GRMZM2G174971	5e-05	262.896	256.503	0.0356	0.9097	0.9504
EGFR-L1	GRMZM2G459854	6.8e-33	899.183	956.565	-0.0891	0.6992	0.8172
EGFR-L2	GRMZM2G164242	2.5e-32	46.117	35.624	0.36	0.5904	0.7388
EGFR-L3	GRMZM2G104658	2.1e-31	796.178	791.762	0.0067	0.9783	0.9864
EGFR-L4	GRMZM5G814851	3.4e-31	416.335	331.573	0.3259	0.2678	0.4486
EGFR-L5	GRMZM2G160922	8.5e-31	903.125	479.683	0.9114	0.0007	0.0084*
EGFR-L6	GRMZM2G152889	8.9e-31	786.123	685.958	0.1956	0.4417	0.6166
EGFR-L7	GRMZM2G059671	7.1e-30	1610.04	1152.46	0.4808	0.1362	0.2926
EGFR-L8	GRMZM2G465833	1.4e-29	1477.34	1102.16	0.4224	0.0656	0.1831
EGFR-L9	GRMZM2G028709	1.4e-29	349.509	225.136	0.6304	0.0729	0.1965
EGFR-L10	GRMZM2G140612	3e-27	3679.86	3997.68	-0.1195	0.6211	0.7616
EGFR-L11	GRMZM2G002531	6.2e-27	130.67	91.644	0.5104	0.2139	0.3917
EGFR-L12	GRMZM2G102088	6.3e-27	2345.47	1803.05	0.3787	0.131	0.2849
GNAI3-L1	GRMZM2G064732	6.7e-65	1269.87	1307.99	-0.0426	0.8468	0.9136
GNAI3-L2	GRMZM2G429113	1.5e-26	1591.69	1210.34	0.3948	0.1582	0.322
GNAI3-L3	GRMZM2G016858	4.2e-24	2492.49	1544.87	0.6889	0.0211	0.0885
ISG15-L1	GRMZM2G116292	1.1e-14	14409.6	17367	-0.2693	0.1798	0.3505
ISG15-L2	GRMZM2G118637	6.5e-14	789.086	457.364	0.7838	0.0059	0.0382
ISG15-L3	GRMZM2G409726	6.9e-14	89823.2	98792.6	-0.1373	0.5664	0.7201
ISG15-L4	GRMZM2G419891	6.9e-14	71907.4	86975.5	-0.2744	0.2363	0.4174
KPNB1-L1	GRMZM2G138419	1.2e-168	4630.17	4926.03	-0.0894	0.6984	0.8167
KPNB1-L2	GRMZM2G066650	2.5e-168	2405.98	2023.54	0.2497	0.2629	0.444
KPNB1-L3	GRMZM2G084767	8.8e-165	5674.8	4418.22	0.3611	0.1123	0.2578
KPNB1-L4	GRMZM2G010452	2.6e-154	2054.22	1486.69	0.4658	0.0847	0.2159
NTRK1-L1	GRMZM2G059671	4.1e-32	1610.04	1152.46	0.4808	0.1362	0.2926
NTRK1-L2	GRMZM2G104658	2.1e-31	796.178	791.762	0.0067	0.9783	0.9864
NTRK1-L3	GRMZM2G098187	3.4e-30	68.441	63.817	0.0979	0.8521	0.9168
NTRK1-L4	GRMZM2G140612	2.5e-29	3679.86	3997.68	-0.1195	0.6211	0.7616
NTRK1-L5	GRMZM2G102088	6.3e-29	2345.47	1803.05	0.3787	0.131	0.2849
NTRK1-L6	GRMZM2G156013	1e-28	4418.52	4280.74	0.0456	0.8326	0.9051
NUP107	GRMZM2G348675	1.4e-23	507.382	237.073	1.0921	0.0602	0.1731
NUP98a	GRMZM2G344924	1.1e-26	3221.21	2210.28	0.5431	0.01	0.0541
NUP98b	GRMZM2G059015	2.6e-26	7423.82	5070.03	0.55	0.0125	0.0629
RANBP2-L1	GRMZM2G162388	7.6e-62	1.848	4.481	-1.3048	0.534	NA
RANBP2-L2	GRMZM2G326111	8.7e-62	184824	221184	-0.2591	0.3017	0.4834
RANBP2-L3	GRMZM2G170397	3.6e-57	3570.41	4783.67	-0.4217	0.0846	0.2157
RANBP2-L4	GRMZM2G063244	1.5e-55	134.97	193.615	-0.5148	0.2181	0.3962
RANBP2-L5	GRMZM2G084521	1.5e-54	9097.71	16212.3	-0.8334	0.0011	0.0117*
RANBP2-L6	GRMZM2G087570	2.1e-54	2461.09	3539.27	-0.5238	0.0163	0.0742
RANBP2-L7	GRMZM2G076544	1.8e-54	1961.01	3085.91	-0.6534	0.0075	0.0445*
RANBP2-L8	GRMZM2G329306	2.1e-50	1695.32	1624.01	0.0614	0.7868	0.8747
RANBP2-L9	GRMZM2G401848	5.5e-50	104.215	180.941	-0.7941	0.0499	0.154
RCC1-L1	GRMZM2G003565	1.1e-29	2636.33	3191.61	-0.2751	0.321	0.5033
RCC1-L2	GRMZM2G134313	8.1e-22	619.386	448.857	0.463	0.1818	0.3528
RCC1-L3	GRMZM2G030542	1.2e-20	1488.17	1270.11	0.2287	0.3017	0.4834
RCC1-L4	GRMZM2G095562	4.2e-20	1916.54	1804.32	0.0868	0.688	0.8091
RCC1-L5	GRMZM2G135770	1.3e-19	2237.38	2500.63	-0.1612	0.5042	0.6704
SEH1	GRMZM2G057853	1.2e-33	2077.79	1837.09	0.1775	0.4015	0.5801
SLC39A4	GRMZM2G001803	5e-12	2083.66	1693.03	0.2986	0.2388	0.4196
UBE2I-L1	GRMZM2G070047	2.4e-73	4552.21	7914.5	-0.7977	0.0029	0.0234*
UBE2I-L2	GRMZM2G063931	1.1e-72	567.859	849.088	-0.5797	0.0466	0.1474
UBE2I-L3	GRMZM2G163398	5e-72	3078.12	3305.41	-0.1029	0.6185	0.7599
UBE2I-L4	GRMZM2G312693	4.3e-70	2421.92	2586.5	-0.0944	0.6833	0.8056
UBE2I-L5	GRMZM2G341089	4.7e-60	185.864	287.349	-0.6254	0.0623	0.1771
UBE2I-L6	GRMZM2G038851	5.5e-60	123.724	201.594	-0.6983	0.0895	0.2234
UBE2I-L7	GRMZM2G007260	2.7e-34	3478.34	3976.46	-0.1927	0.397	0.576
XPO1-L1	GRMZM2G022258	0	1554.76	1327.55	0.2277	0.2968	0.4791
XPO1_L2	GRMZM2G167031	0	2414.68	1803.88	0.4212	0.0519	0.1577
EFNB2	No Hits	NA	NA	NA	NA	NA	NA
IFI16	No Hits	NA	NA	NA	NA	NA	NA
LYPD3	No Hits	NA	NA	NA	NA	NA	NA
NUP153	No Hits	NA	NA	NA	NA	NA	NA
OBSL1	No Hits	NA	NA	NA	NA	NA	NA
POPDC2	No Hits	NA	NA	NA	NA	NA	NA
REL	No Hits	NA	NA	NA	NA	NA	NA
TCTN2	No Hits	NA	NA	NA	NA	NA	NA
TCTN3	No Hits	NA	NA	NA	NA	NA	NA
ae-value score for protein BLAST of Homo sapiens AAAS gene interactors against maize genome.
bGenes that are significantly differentially expressed at a FDR<0.05 is indicated by an asterisk.
